# Supplementary material
Source: PubMed Central journal article supplement (PMC4375534)
Supplement: mmc1.pdf [file mmc1.pdf]

The American Journal of Human Genetics

Supplemental Data

**Mutations in *SEC24D*, Encoding a Component  
of the COPII Machinery, Cause a Syndromic Form  
of Osteogenesis Imperfecta**

Lutz Garbes, Kyungho Kim, Angelika Rieß, Heike Hoyer-Kuhn, Filippo Beleggia, Andrea Bevot, Mi Jeong Kim, Yang Hoon Huh, Hee-Seok Kweon, Ravi Savarirayan, David Amor, Purvi M. Kakadia, Tobias Lindig, Karl Oliver Kagan, Jutta Becker, Simeon A. Boyadjiev, Bernd Wollnik, Oliver Semler, Stefan K. Bohlander, Jinoh Kim, and Christian Netzer

**Figure S1. Comparison of the Facial Phenotype of Individuals with Cole-Carpenter Syndrome.**

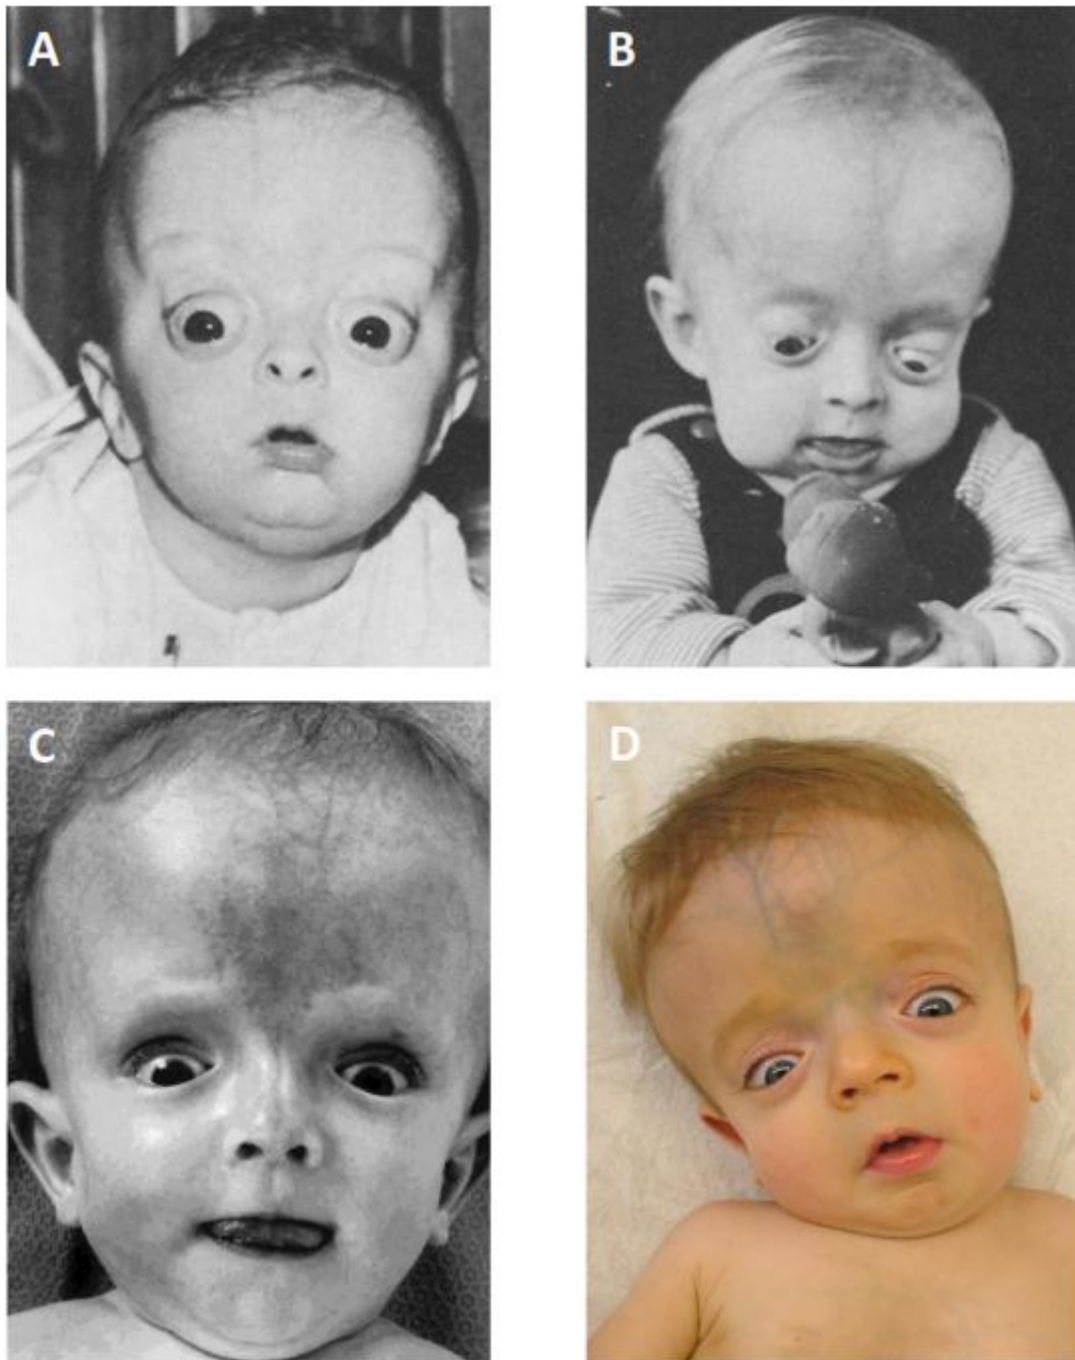

(A) Individual 1 of the original publication by Cole and Carpenter, 1986. (B) Individual 2 of the original publication by Cole and Carpenter.<sup>1</sup> (C) Individual published by Amor et al.<sup>2</sup> (D) Affected individual of family 1 at the age of 9 months.

Photographs reprinted with kind permission of *The Journal of Pediatrics* (A and B) and *The American Journal of Medical Genetics* (C).

**Figure S2. SEC 24D Sequence Comparison.**

|                          |                 |      |          |        |      |
|--------------------------|-----------------|------|----------|--------|------|
| <b>A</b>                 |                 | 1015 | 1020     | 1024   |      |
| H. sapiens SEC24D        | LVEDKGLYGGSS    | Y    | VDFLCCV  | HKEIC  | 1028 |
| H. sapiens SEC24C        | LVEDKSLSGGAS    | Y    | VDFLCHMH | KEIR   | 1090 |
| D. melanogaster SEC24CD  | LVEDRGTDGSAS    | Y    | VDFLCHMH | KEIK   | 1189 |
| C. elegans SEC24.1       | LVEDKAGPANMS    | Y    | VDYLVDI  | HRKIR  | 1122 |
| A. thaliana CEF          | MVEDRGS-GGAS    | Y    | VDFLVSV  | HRQIQ  | 1092 |
| A. thaliana At4g32640    | MVEDRTA-SGP     | SY   | VEFLVQV  | HRQIQ  | 1076 |
| A. thaliana At3g07100    | LIEDQMG-GSSG    | Y    | VDWILQL  | HRQVQ  | 1036 |
| H. sapiens SEC24A        | MIEDRTE-SAL     | SY   | YEFLLHI  | QQQVN  | 1092 |
| H. sapiens SEC24B        | LIEDRTE-AAF     | SY   | YEFLLHV  | QQQIC  | 1267 |
| D. melanogaster SEC24AB  | RLTDDRSESSL     | SY   | YEFLLQH  | IRAQVK | 1184 |
| C. elegans SEC24.2       | LVDDRSE-STH     | SY   | VEFLQHL  | KREIS  | 982  |
| S. cerevisiae SEC24      | LVEDKIL-NNES    | Y    | REFLQIM  | KARIS  | 925  |
| S. cerevisiae SFB2(ISS1) | LVEDKVL-NCAS    | Y    | REYLQSM  | KTSIN  | 875  |
| S. cerevisiae SFB3(LST1) | LCEDKTVNRIE     | SY   | DNYLVIM  | HKKIQ  | 902  |
| <b>B</b>                 |                 |      |          |        |      |
| H. sapiens SEC24D        | NPYSQQLRMIMGI   | I    | Q        | KRP    | 982  |
| P. troglodytes SEC24D    | NPYSQQLRMIMGI   | I    | Q        | KRP    | 982  |
| M. musculus SEC24D       | SPHSQQLRMIMNNI  | Q    | K        | KP     | 982  |
| G. gallus SEC24D         | NPYSKKIKSIVEHI  | Q    | N        | KP     | 937  |
| X. tropicalis SEC24C*    | SAHSKKLRSIMDAI  | Q    | K        | TCP    | 975  |
| D. rerio SEC24D          | NPHSRKLHSIISRIS | Q    | Q        | RA     | 979  |
| H. sapiens SEC24C        | NPLSKKVRGLIDSL  | R    | A        | QRP    | 1044 |
| P. troglodytes SEC24C    | NPLSKKVRGLIDSL  | R    | A        | QRS    | 1044 |
| M. musculus SEC24C       | NPLSKKVRGLIDSL  | R    | A        | QRM    | 1046 |
| G. gallus SEC24C         | NPFSKKVRSIIDML  | H    | L        | QRS    | 1069 |
| X. tropicalis SEC24D*    | NPISNKIRGIITMF  | R    | A        | QRP    | 1082 |
| D. rerio SEC24C          | NPFSKRLKEIIESI  | R    | A        | QRS    | 1092 |
| D. melanogaster SEC24CD  | TPLAKRIHGILEQI  | M    | K        | ERS    | 1143 |
| C. elegans SEC24.1       | NGHSRALRRAIQL   | L    | P        | R-GI   | 1076 |

(A) Sequence comparison near Ser1015 (red) was performed by ClustalW2. Highly conserved residues were colored green. Following sequences were used for comparison: *Homo sapiens* SEC24A (O95486), SEC24B (O95487), SEC24C (P53992) and SEC24D (O94855); *Drosophila melanogaster* SEC24AB (A1Z813) and SEC24CD (M9PC99); *Caenorhabditis elegans* SEC24.1 (Q19371) and SEC24.2 (Q23368); *Arabidopsis thaliana* CEF (Q9M291), At3g07100 (Q9SFU0), At4g32640 (Q9M081); *Saccharomyces cerevisiae* SEC24 (P40482),

SFB3 (LST1, P38810) and SFB2 (ISS1, P53953). (B) SEC24C and SEC24D sequences were compared by ClustalW2. Highly conserved residues and Gln978 of SEC24D were colored green and red, respectively. The following sequences were used for comparison: *Homo sapiens* SEC24C (P53992) and SEC24D (O94855); *Pan troglodytes* SEC24C (H2Q241) and SEC24D (K7B5H4); *Mus musculus* SEC24C (G3X972) and SEC24D (Q6NXL1); *Gallus gallus* SEC24C (E1BUD8) and SEC24D (E1BSP8); *Xenopus tropicalis* SEC24C (F6ZIIY6) and SEC24D (F6YFQ0); *Danio rerio* SEC24C (D5LHQ7) and SEC24D (F1R3A4); *Drosophila melanogaster* SEC24CD (M9PC99); *Caenorhabditis elegans* SEC24.1 (Q19371). Note that a phylogenetic analysis of SEC24s indicates that SEC24C and SEC24D of *X. tropicalis* (asterisks) are actually close to SEC24D and SEC24C of other species, respectively (data not shown).

**Figure S3. Radiographic Findings of the Affected Individual from Family 1 at Different Ages.**

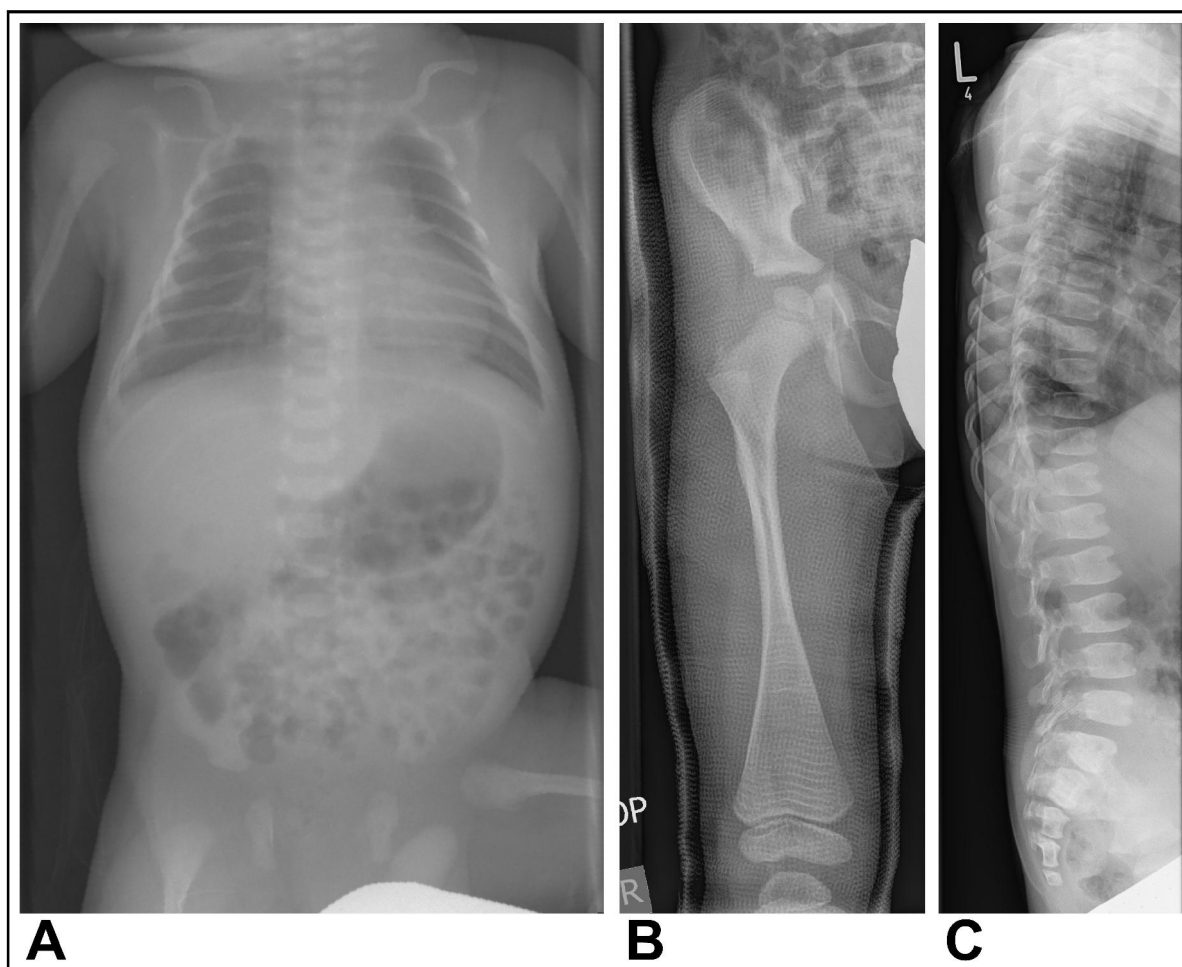

(A) Postnatal skeletal survey of thorax and abdomen demonstrating thin ribs and callus formation on the right thoracic side, normal clavicles and flattened vertebrae. (B) A.p. radiograph of the right femur and hip at the age of 5.7 years presenting zebra lines after multiple cycles of intravenous bisphosphonate treatment, broadened distal epiphysis of the femur with an increased metaphyseal index (0.71)<sup>3;4</sup> as a sign of decreased remodelling after bisphosphonate treatment. The iliac wing is high and narrow. (C) Lateral radiograph of the spine showing flattened vertebrae with anterior notches and posterior wedging as well as mild kyphosis in the thoracic part.

**Figure S4. Radiographic Findings of One Affected Fetus After Termination of Pregnancy in the 23rd Week of Gestation.**

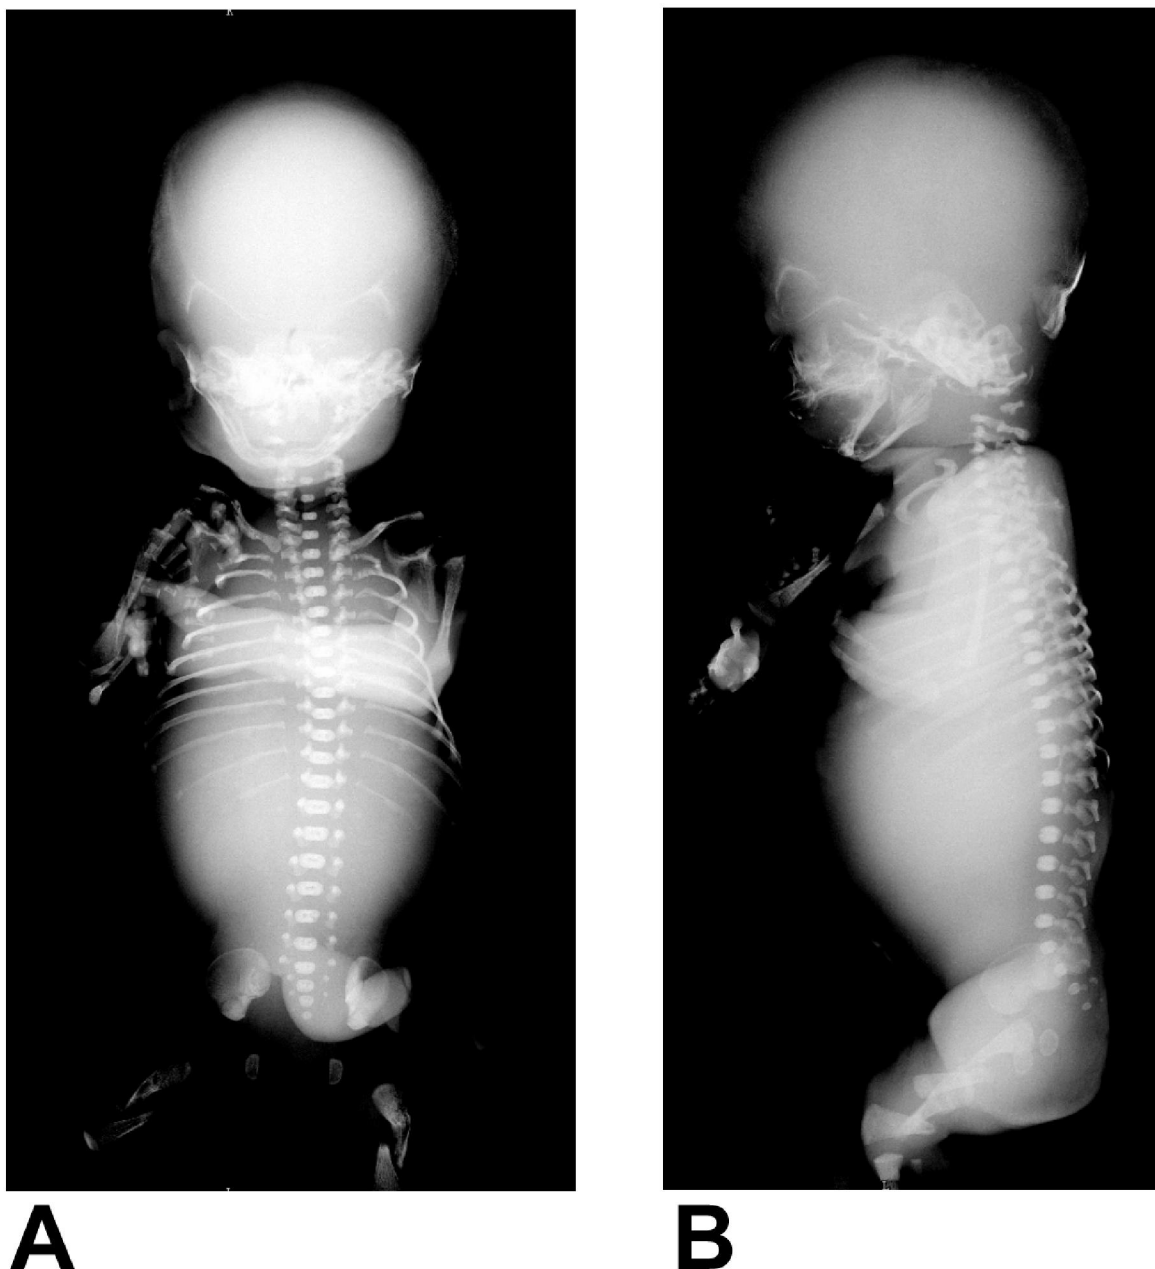

(A) Post mortem anteriorposterior skeletal survey of the 23<sup>rd</sup> week's fetus demonstrating delayed skeletal development (reduced frontal calvarial ossification, no pubic bones are seen).<sup>5</sup> The fetus presents with thin ribs but without severe thoracic hypoplasia and callus formation, with short, fractured, and mildly bowed long bones, normal clavicles, and normal ossified vertebrae. Ossification of the calvarium is clearly reduced in contrast to the skull base. Remarkable is the discrepancy between skull ossification and ossification of the rest of the skeleton, a pattern which was also observed in the affected individual of family 1. (B) Post mortem lateral skeletal survey of the fetus confirming the discrepancy between skull base and calvarial ossification. The long bones of the upper extremity and vertebrae are well ossified and normal developed.

**Table S1. Clinical Features of the Affected Individual from Family 1.**

| <b>Clinical Findings</b>                                                      | <b>Affected Individual</b>                                        |
|-------------------------------------------------------------------------------|-------------------------------------------------------------------|
| <b>Disease severity</b>                                                       | moderate                                                          |
| <b>Age at first presentation</b>                                              | 7 years 4 months                                                  |
| <b>Confirmed prenatal fractures</b>                                           | yes<br>(both humeri and 2 ribs)                                   |
| <b>Birth length / birth weight / head circumference at birth</b>              | 47 cm /2800g/ 32cm<br>all < - 2 SD                                |
| <b>APGAR</b>                                                                  | 7/7/9                                                             |
| <b>Fractures before bisphosphonate treatment</b>                              | Yes                                                               |
| <b>Age at start of bisphosphonate treatment</b>                               | 2 months (i.v. pamidronate)<br>(Glorieux et al. 1998)             |
| <b>Number of lower extremity fractures since birth</b>                        | 6                                                                 |
| <b>Number of upper extremity fractures since birth</b>                        | 3                                                                 |
| <b>Weight at visit kg/BMI (SD)</b>                                            | 15.0/14.6                                                         |
| <b>Length at visit cm/SD</b>                                                  | 101.5/- 4.5                                                       |
| <b>Head circumference at visit (cm)</b>                                       | 55.5                                                              |
| <b>Sitting height at visit (cm)</b>                                           | 78.5                                                              |
| <b>Arm span at visit (cm)</b>                                                 | 99.0                                                              |
| <b>Color of sclera</b>                                                        | normal                                                            |
| <b>Dentinogenesis imperfecta</b>                                              | no                                                                |
| <b>Primary dentition</b>                                                      | normal                                                            |
| <b>Secondary dentition</b>                                                    | mild misalignment of teeth                                        |
| <b>Hypermobility of joints</b>                                                | no                                                                |
| <b>Spine</b>                                                                  | flat vertebrae (posterior wedging, anterior notches)              |
| <b>Pelvis</b>                                                                 | small hypoplastic acetabular roof;<br>high and narrow iliac wings |
| <b>Scoliosis</b>                                                              | no                                                                |
| <b>Chest deformities</b>                                                      | pectus excavatum                                                  |
| <b>Severe bowing of extremities</b>                                           | no                                                                |
| <b>Hearing impairment</b>                                                     | no                                                                |
| <b>Cardiac ultrasound</b>                                                     | lower normal                                                      |
| <b>Intelligence</b>                                                           | normal <sup>a</sup>                                               |
| <b>Mobility at visit (BAMF (Cintas et al. 2003))</b>                          | 9                                                                 |
| <b>Gross motor function measurement test (GMFM) (Russell et al. 1989)</b>     | 96.6%                                                             |
| <b>1 Minute walking test</b>                                                  | 120 m (without aids)                                              |
| <b>6 Minute walking test</b>                                                  | 520 m (without aids)                                              |
| <b>Deoxy-Pyridinolin-Diphosphat (marker for osteoclastic activity)</b>        | decreased                                                         |
| <b>Bone density, DXA whole body without head (g/cm<sup>2</sup>)/(z-score)</b> | 0.464 /- 2.0                                                      |
| <b>Bone density, DXA ap spine (g/cm<sup>2</sup>)/(z-score)</b>                | 0.520 /- 2.0                                                      |

<sup>a</sup> Tested with “Hannover-Wechsler Intelligence test for preschool kids” and “ Kaufmann Assessment Battery for children”

**Table S2. Genes Tested by Sanger Sequencing in Individuals with the Clinical Diagnosis of Cole-Carpenter Syndrome.**

| <i>Family 1</i><br>(Index patient tested) |            | <i>Family 2</i><br>(one of two fetuses tested) |            |
|-------------------------------------------|------------|------------------------------------------------|------------|
|                                           | <i>MIM</i> |                                                | <i>MIM</i> |
| <i>COL1A1</i>                             | 120150     | <i>COL1A1</i>                                  | 120150     |
| <i>COL1A2</i>                             | 120160     | <i>COL1A2</i>                                  | 120160     |
| <i>ALPL</i>                               | 171760     | <i>ALPL</i>                                    | 171760     |
| <i>CRTAP</i>                              | 605497     | <i>BMP1</i>                                    | 112264     |
| <i>FKBP10</i>                             | 607063     | <i>CRTAP</i>                                   | 605497     |
| <i>LEPRE1</i>                             | 610339     | <i>FKBP10</i>                                  | 607063     |
| <i>PPIB</i>                               | 123841     | <i>LEPRE1</i>                                  | 610339     |
| <i>SERPINF1</i>                           | 172860     | <i>PPIB</i>                                    | 123841     |
| <i>SERPINH1</i>                           | 600943     | <i>SERPINF1</i>                                | 172860     |
| <i>SP7</i>                                | 606633     | <i>SERPINH1</i>                                | 600943     |
|                                           |            | <i>SP7</i>                                     | 606633     |

**Table S3. Candidate Genes and Variants Identified by Whole-Exome Sequencing in Family 1.**

| <i>Position</i>       | <i>Ref</i> | <i>Alt</i> | <i>Gene</i>   | <i>OMIM</i>   | <i>Transcript</i> | <i>cDNA</i>           | <i>protein</i>          |
|-----------------------|------------|------------|---------------|---------------|-------------------|-----------------------|-------------------------|
| <i>chr4:119644725</i> | <i>G</i>   | <i>A</i>   | <i>SEC24D</i> | <i>607186</i> | <i>NM_014822</i>  | <i>c.C3044T</i>       | <i>p.S1015F</i>         |
| <i>chr4:119736666</i> | <i>G</i>   | <i>A</i>   | <i>SEC24D</i> | <i>607186</i> | <i>NM_014822</i>  | <i>c.C613T</i>        | <i>p.Q205X</i>          |
| <i>chr6:137325901</i> | <i>TAA</i> | <i>TA</i>  | <i>IL20RA</i> | <i>605620</i> | <i>NM_014432</i>  | <i>IVS</i>            | <i>altered splicing</i> |
| <i>chr7:139611038</i> | <i>G</i>   | <i>A</i>   | <i>TBXAS1</i> | <i>274180</i> | <i>NM_030984</i>  | <i>c.G254A</i>        | <i>p.R85H</i>           |
| <i>chr7:139715531</i> | <i>G</i>   | <i>A</i>   | <i>TBXAS1</i> | <i>274180</i> | <i>NM_030984</i>  | <i>c.G1238A</i>       | <i>p.R413Q</i>          |
| <i>chr11:1275486</i>  | <i>G</i>   | <i>A</i>   | <i>MUC5B</i>  | <i>600770</i> | <i>NM_002458</i>  | <i>c.G15382A</i>      | <i>p.A5128T</i>         |
| <i>chr11:1270475</i>  | <i>C</i>   | <i>T</i>   | <i>MUC5B</i>  | <i>600770</i> | <i>NM_002458</i>  | <i>c.C12365T</i>      | <i>p.T4122M</i>         |
| <i>chr13:76427413</i> | <i>C</i>   | <i>A</i>   | <i>LMO7</i>   | <i>604362</i> | <i>NM_015842</i>  | <i>c.C3851A</i>       | <i>p.P1284H</i>         |
| <i>chr13:76429387</i> | <i>T</i>   | <i>C</i>   | <i>LMO7</i>   | <i>604362</i> | <i>NM_005358</i>  | <i>c.3816-9T&gt;C</i> | <i>altered splicing</i> |

Filtering for deleterious variants was performed under an autosomal recessive disease model as described in the main text. The variant in *IL20RA* was homozygous. Candidate genes which were also identified in family 2 are marked in bold.

**Table S4. Candidate Genes and Variants Identified by Whole-Exome Sequencing in Family 2.**

| <i>Position</i>              | <i>Ref</i>      | <i>Alt</i>      | <i>Gene</i>                     | <i>OMIM</i>          | <i>Transcript</i>       | <i>cDNA</i>            | <i>protein</i>         |
|------------------------------|-----------------|-----------------|---------------------------------|----------------------|-------------------------|------------------------|------------------------|
| <i>chr1:144873964</i>        | <i>G</i>        | <i>A</i>        | <i>PDE4DIP</i>                  | <i>608117</i>        | <i>NM_001198832</i>     | <i>c.C4861T</i>        | <i>p.Q1621X</i>        |
| <i>chr1:144857691</i>        | <i>C</i>        | <i>T</i>        | <i>PDE4DIP</i>                  | <i>608117</i>        | <i>NM_001198832</i>     | <i>c.G6045A</i>        | <i>p.M2015I</i>        |
| <i>chr1:156268808</i>        | <i>A</i>        | <i>G</i>        | <i>VHLL</i>                     | ---                  | <i>NM_001004319</i>     | <i>c.T173C</i>         | <i>p.I58T</i>          |
| <i>chr1:156268845</i>        | <i>G</i>        | <i>A</i>        | <i>VHLL</i>                     | ---                  | <i>NM_001004319</i>     | <i>c.C136T</i>         | <i>p.R46C</i>          |
| <i>chr2:61719303</i>         | <i>C</i>        | <i>A</i>        | <i>XPO1</i>                     | <i>602559</i>        | <i>NM_003400</i>        | <i>c.G1754T</i>        | <i>p.C585F</i>         |
| <i>chr2:61719303</i>         | <i>C</i>        | <i>A</i>        | <i>XPO1</i>                     | <i>602559</i>        | <i>NM_003400</i>        | <i>c.G1754T</i>        | <i>p.C585F</i>         |
| <i>chr2:196741296</i>        | <i>A</i>        | <i>T</i>        | <i>DNAH7</i>                    | <i>610061</i>        | <i>NM_018897</i>        | <i>c.T6089A</i>        | <i>p.V2030D</i>        |
| <i>chr2:196756535</i>        | <i>GAA</i>      | <i>GA</i>       | <i>DNAH7</i>                    | <i>610061</i>        |                         |                        | ---                    |
| <i>chr3:9786696</i>          | <i>A</i>        | <i>C</i>        | <i>BRPF1</i>                    | <i>602410</i>        | <i>NM_004634</i>        | <i>c.A2907C</i>        | <i>p.L969F</i>         |
| <i>chr3:9785283</i>          | <i>T</i>        | <i>G</i>        | <i>BRPF1</i>                    | <i>602410</i>        | <i>NM_004634</i>        | <i>c.T2315G</i>        | <i>p.V772G</i>         |
| <b><i>chr4:119649741</i></b> | <b><i>T</i></b> | <b><i>G</i></b> | <b><i>SEC24D</i></b>            | <b><i>607186</i></b> | <b><i>NM_014822</i></b> | <b><i>c.A2933C</i></b> | <b><i>p.Q978P</i></b>  |
| <b><i>chr4:119644725</i></b> | <b><i>G</i></b> | <b><i>A</i></b> | <b><i>SEC24D</i></b>            | <b><i>607186</i></b> | <b><i>NM_014822</i></b> | <b><i>c.C3044T</i></b> | <b><i>p.S1015F</i></b> |
| <i>chr5:90101200</i>         | <i>G</i>        | <i>A</i>        | <i>GPR98</i>                    | <i>602851</i>        | <i>NM_032119</i>        | <i>c.G14761A</i>       | <i>p.A4921T</i>        |
| <i>chr5:89933700</i>         | <i>C</i>        | <i>G</i>        | <i>GPR98</i>                    | <i>602851</i>        | <i>NM_032119</i>        | <i>c.C2175G</i>        | <i>p.I725M</i>         |
| <i>chr6:90494849</i>         | <i>C</i>        | <i>T</i>        | <i>MDN1</i>                     | ---                  | <i>NM_014611</i>        | <i>c.1335-4G&gt;A</i>  | <i>splicing</i>        |
| <i>chr6:90405631</i>         | <i>C</i>        | <i>T</i>        | <i>MDN1</i>                     | ---                  | <i>NM_014611</i>        | <i>c.G9464A</i>        | <i>p.R3155Q</i>        |
| <i>chr11:65402768</i>        | <i>T</i>        | <i>G</i>        | <i>PCNXL3</i>                   | ---                  | <i>NM_032223</i>        | <i>c.T5033G</i>        | <i>p.V1678G</i>        |
| <i>chr11:65403969</i>        | <i>C</i>        | <i>T</i>        | <i>PCNXL3</i>                   | ---                  | <i>NM_032223</i>        | <i>c.C5701T</i>        | <i>p.R1901W</i>        |
| <i>chr12:644443</i>          | <i>A</i>        | <i>C</i>        | <i>B4GALNT3</i>                 | <i>612220</i>        | <i>NM_173593</i>        | <i>c.273+8A&gt;C</i>   |                        |
| <i>chr12:644374</i>          | <i>G</i>        | <i>A</i>        | <i>B4GALNT3</i>                 | <i>612220</i>        | <i>NM_173593</i>        | <i>c.G212A</i>         | <i>p.R71K</i>          |
| <b><i>chr13:76430676</i></b> | <b><i>C</i></b> | <b><i>T</i></b> | <b><i>LMO7</i></b>              | <b><i>604362</i></b> | <b><i>NM_015842</i></b> | <b><i>c.C3997T</i></b> | <b><i>p.P1333S</i></b> |
| <b><i>chr13:76397701</i></b> | <b><i>A</i></b> | <b><i>G</i></b> | <b><i>LMO7</i></b>              | <b><i>604362</i></b> | <b><i>NM_015842</i></b> | <b><i>c.A1942G</i></b> | <b><i>p.M648V</i></b>  |
| <i>chr14:75134206</i>        | <i>G</i>        | <i>C</i>        | <i>KIAA0317</i>                 | <i>615380</i>        | <i>NM_001039479</i>     | <i>c.C2006G</i>        | <i>p.A669G</i>         |
| <i>chr14:75134206</i>        | <i>G</i>        | <i>C</i>        | <i>KIAA0317</i>                 | <i>615380</i>        | <i>NM_001039479</i>     | <i>c.C2006G</i>        | <i>p.A669G</i>         |
| <i>chr17:21318731</i>        | <i>C</i>        | <i>T</i>        | <i>KCNJ12,</i><br><i>KCNJ18</i> | <i>602323</i>        | <i>NM_021012</i>        | <i>c.C77T</i>          | <i>p.S26L</i>          |
| <i>chr17:21318896</i>        | <i>G</i>        | <i>A</i>        | <i>KCNJ12,</i><br><i>KCNJ18</i> | <i>602323</i>        | <i>NM_021012</i>        | <i>c.G242A</i>         | <i>p.R81Q</i>          |
| <i>chr17:39635147</i>        | <i>C</i>        | <i>T</i>        | <i>KRT35</i>                    | <i>602764</i>        | <i>NM_002280</i>        | <i>c.G812A</i>         | <i>p.C271Y</i>         |
| <i>chr17:39636977</i>        | <i>G</i>        | <i>C</i>        | <i>KRT35</i>                    | <i>602764</i>        | <i>NM_002280</i>        | <i>c.C373G</i>         | <i>p.L125V</i>         |
| <i>chr17:73569700</i>        | <i>C</i>        | <i>G</i>        | <i>LLGL2</i>                    | ---                  | <i>NM_004524</i>        | <i>c.C2864G</i>        | <i>p.P955R</i>         |
| <i>chr17:73569700</i>        | <i>C</i>        | <i>G</i>        | <i>LLGL2</i>                    | ---                  | <i>NM_004524</i>        | <i>c.C2864G</i>        | <i>p.P955R</i>         |
| <i>chr17:26694784</i>        | <i>C</i>        | <i>A</i>        | <i>VTN</i>                      | <i>193190</i>        | <i>NM_000638</i>        | <i>c.G1276T</i>        | <i>p.V426L</i>         |
| <i>chr17:26694784</i>        | <i>C</i>        | <i>A</i>        | <i>VTN</i>                      | <i>193190</i>        | <i>NM_000638</i>        | <i>c.G1276T</i>        | <i>p.V426L</i>         |
| <i>chr19:9066140</i>         | <i>T</i>        | <i>G</i>        | <i>MUC16</i>                    | <i>606154</i>        | <i>NM_024690</i>        | <i>c.A21306C</i>       | <i>p.L7102F</i>        |
| <i>chr19:9064309</i>         | <i>AGGGG</i>    | <i>A</i>        | <i>MUC16</i>                    | <i>606154</i>        | <i>NM_024690</i>        | <i>c.23133_23137T</i>  | ---                    |

Filtering for deleterious variants was performed as described in the main text. We assumed autosomal recessive inheritance of the phenotype. Note that the non-affected parents and not the affected fetuses were analyzed, which increased the number of candidates. We searched for genes harboring potential mutations in a heterozygous state in both the mother's and the father's dataset. Candidate genes which were also identified in family 1 are marked in bold. The genotype of the affected fetuses was only determined for the variants in *SEC24D* and *LMO7*.

**Table S5. Detailed Comparison of Clinical and Radiological Findings in the Affected Individual from Family 1 and in the Six Published Individuals with Cole-Carpenter Syndrome.**

|                                                        | <i>This report, index patient from family 1</i> | <i>Cole and Carpenter<sup>1</sup> pat. 1</i> | <i>Cole and Carpenter<sup>1</sup> pat.2</i> | <i>Marwaha et al.<sup>8</sup></i>           | <i>Stopfer et al.<sup>9</sup></i> | <i>McDermot et al.<sup>7</sup></i> | <i>Amor et al.<sup>2</sup></i> |
|--------------------------------------------------------|-------------------------------------------------|----------------------------------------------|---------------------------------------------|---------------------------------------------|-----------------------------------|------------------------------------|--------------------------------|
| <i>Birth parameters</i>                                | Decreased                                       | Normal                                       | Normal                                      | Decreased                                   | N. d.                             | Decreased                          | Decreased                      |
| <i>Long bone deformities</i>                           | Yes                                             | Yes                                          | Yes                                         | Yes                                         | yes                               | N. d.                              | Yes                            |
| <i>Fractures first two years</i>                       | Yes                                             | Yes                                          | Yes                                         | N. d.                                       | yes                               | Yes                                | Yes                            |
| <i>Metaphyseal abnormalities</i>                       | Yes                                             | Yes                                          | Yes                                         | N. d.                                       | yes                               | Normal                             | Yes                            |
| <i>Spondylodysplastic changes</i>                      | Yes                                             | Yes                                          | Yes                                         | Yes                                         | N. d.                             | normal                             | Yes                            |
| <i>Disturbed ossification of the skull<sup>a</sup></i> | Yes                                             | Yes                                          | Yes                                         | Yes                                         | Yes                               | N. d.                              | Yes                            |
| <i>Increased head circumference</i>                    | Yes                                             | Yes                                          | N. d.                                       | Yes                                         | N. d.                             | No                                 | Yes                            |
| <i>Skull erosions</i>                                  | Yes                                             | Yes                                          | N. d.                                       | N. d.                                       | N. d.                             | N. d.                              | No                             |
| <i>Craniosynostosis</i>                                | Yes                                             | Yes                                          | Yes                                         | Yes                                         | Yes                               | No                                 | Yes                            |
| <i>Hydrocephalus</i>                                   | Yes                                             | Yes                                          | Yes                                         | Yes                                         | N. d.                             | Yes                                | No                             |
| <i>VP-Shunt</i>                                        | No                                              | Yes                                          | No                                          | Yes                                         | N. d.                             | No                                 | No                             |
| <i>Increased fontanella</i>                            | Yes                                             | N. d.                                        | Yes                                         | Yes                                         | N. d.                             | N. d.                              | No                             |
| <i>Wide sutures</i>                                    | Yes                                             | N. d.                                        | Yes, at age 2 months                        | Yes                                         | N. d.                             | N. d.                              | Yes                            |
| <i>Wormian bones</i>                                   | Yes                                             | Yes                                          | No                                          | no                                          | N. d.                             | -                                  | Yes                            |
| <i>Frontal bossing</i>                                 | Yes                                             | Yes                                          | Yes                                         | N. d.                                       | Yes                               | Yes                                | Yes                            |
| <i>Ocular proptosis</i>                                | Yes                                             | Yes                                          | Yes                                         | Yes                                         | Yes                               | No                                 | Yes                            |
| <i>Short stature</i>                                   | Yes                                             | Yes                                          | Yes                                         | Yes                                         | N. d.                             | Yes                                | Yes                            |
| <i>Mid-facial hypoplasia</i>                           | Yes                                             | Yes                                          | Yes                                         | N. d.                                       | N. d.                             | N. d.                              | N. d.                          |
| <i>Micrognathia</i>                                    | Yes                                             | Yes                                          | Yes                                         | Yes                                         | N. d.                             | N. d.                              | Yes                            |
| <i>Fine motor skills</i>                               | Normal                                          | Normal                                       | Normal                                      | N.d.                                        | N. d.                             | Delayed                            | Delayed                        |
| <i>Normal speech</i>                                   | Yes                                             | Yes                                          | Yes                                         | Yes                                         | N. d.                             | Delayed                            | Yes                            |
| <i>High voice</i>                                      | Yes                                             | Yes                                          | Yes                                         | Yes                                         | N. d.                             | N. d.                              | Yes                            |
| <i>Blue sclera</i>                                     | Yes                                             | Yes                                          | Yes                                         | Yes                                         | Yes                               | Yes                                | Yes                            |
| <i>Walking impaired</i>                                | Yes                                             | Yes                                          | N. d.                                       | N. d.                                       | N. d.                             | Yes                                | Yes                            |
| <i>Muscle hypotonia</i>                                | No                                              | N. d.                                        | Yes                                         | Yes                                         |                                   | Yes                                | Yes                            |
| <i>Teeth abnormalities (Colour / eruption)</i>         | No, only misalignment                           | Yes                                          | N. d.                                       | N. d.                                       | N. d.                             | Yes                                | Yes                            |
| <i>Reason for referral</i>                             | Fractures                                       | Fractures                                    | Hypotonia, failure to thrive                | Increased head circumference at age 2 weeks | N. d.                             | Fractures                          | Growth failure                 |
| <i>Ear abnormalities</i>                               | Yes                                             | N. d.                                        | N. d.                                       | N. d.                                       | Yes                               | N. d.                              | N. d.                          |
| <i>Osteopenia</i>                                      | Yes                                             | Yes                                          | Yes                                         | Yes                                         | Yes                               | Yes                                | Yes                            |

N. d. = not described

<sup>a</sup>This term is used as a general term for craniosynostosis and / or skull ossification defects.

### **Supplemental Note: Clinical Report of the Affected Individual from Family 1 with Suspected Diagnosis of Cole-Carpenter Syndrome.**

The boy was the second child of unrelated and healthy parents. His sister was also healthy. During pregnancy, an oligohydramnion was diagnosed. The individual was born after 41 weeks of gestation by vaginal delivery. The birth weight was 2800 g (< 3<sup>rd</sup> centile), length was 47 cm (< 3<sup>rd</sup> centile) and head circumference 32,5 cm (< 3<sup>rd</sup> centile). The following dysmorphic features were noted postnatally: turriccephalus, exophthalmus, down-slanting palpebral fissures, an angular root of the nose, retrognathia, and gaping fontanelles. Ophthalmological analysis was normal. Sonographical and X-ray analysis confirmed new as well as older fractures of the right clavicle, multiple ribs, and both radii, and documented extensive ossification defects of the cranium and craniosynostosis. The presence of multiple fractures lead to Osteogenesis imperfecta as a putative diagnosis, and a treatment with cyclical application of pamidronate, a biphosphonate, was initiated. The affected individual's weight with 8 month was 5.2 kg (< 3<sup>rd</sup> centile), and his head circumference was 43.5 cm (> 3<sup>rd</sup> centile). At the age of 9 months, his height was 62.2 cm (0.5 cm < 3<sup>rd</sup> centile). He tried to stand up, and there were no signs of neurodevelopmental delay. The boy's facial features at this age were described as follows: He had a wide fontanelle, a triangle shape of the face with a receding forehead, hypertelorism, proptosis of the eyes, "sunset" eyes, mid-face hypoplasia, a high palatine, microretrognathia and a slight dysplasia of the right concha. At the age of 15 months, the boy was seen again with a weight of 6140 g (< 3<sup>rd</sup> centile) and a length of 67 cm (< 3<sup>rd</sup> centile). The last visit prior to the recruitment for the genetic study was at the age of 4 4/12 years, when the affected individual presented with a weight of 11300 g (< 3<sup>rd</sup> centile), a length of 87 cm (< 3<sup>rd</sup> centile) and a head circumference of 54 cm (>97 centile). His motor development was delayed, possibly due to recurrent fractures of the extremities, but he was now able to walk, to run, and to climb stairs. He presented with a good general condition and normal mental development. A cranial CT scan documented dilated ventricles and subarachnoid spaces, in addition to the skull ossification defects. Brain parenchyma was normal. Two month later, a nasolacrimal duct stenosis was operated.

## Supplemental References

1. Cole D.E., Carpenter T.O. (1987). Bone fragility, craniosynostosis, ocular proptosis, hydrocephalus, and distinctive facial features: a newly recognized type of osteogenesis imperfecta. *J. Pediatr.* 110, 76-80
2. Amor D.J., Savarirayan R, Schneider A.S., Bankier A (2000). New case of Cole-Carpenter syndrome. *Am. J. Med. Genet.* 92, 273-277
3. Land, C., Rauch, F., and Glorieux, F. H.(2006). Cyclical intravenous pamidronate treatment affects metaphyseal modeling in growing patients with osteogenesis imperfecta. *J. Bone Miner. Res.*, 21, 374-9.
4. Ward, K., Cowell, C.T., and Little, D.G. (2005). Quantification of metaphyseal modeling in children treated with bisphosphonates. *Bone*, 36, 999-1002.
5. Schumacher, R., Seaver, L.H., Spranger J. (2010). *Fetal Radiology: A diagnostic Atlas*. Springer 2<sup>nd</sup> Edition, Heidelberg, Germany
7. MacDermot, K.D., Buckley, B., and Van Someren, V. (1995). Osteopenia, abnormal dentition, hydrops fetalis and communicating hydrocephalus. *Clin Genet* 48, 217-220.
8. Marwaha, R.K., Sarkar, B., Katariya, S., and Jayshree, K. (1993). Cole-Carpenter's syndrome. *Indian J Pediatr* 60, 305-308.
9. Stopfer H, H.A., Magilner A, Schneider A. (1992). A variant type of osteogenesis imperfecta: confirmation of a rare phenotype. *Am J Hum Genet* 51, A108.
